# Supplementary material for: A hybrid method for prediction and repositioning of drug Anatomical Therapeutic Chemical classes
Source: Royal Society of Chemistry journal article supplement (doi:10.1039/c3mb70490d), 2014-01-24
Supplement: c3mb70490d_2.pdf [file c3mb70490d_2.pdf]

**Supplementary Material II:** The dataset  $S_{\text{ex-te}}$  consisting of 110 drug samples, classified into 14 main ATC-class.

(1) 23 drug samples in class “Alimentary tract and metabolism”

|         |         |         |         |         |         |
|---------|---------|---------|---------|---------|---------|
| DB00030 | DB00129 | DB00146 | DB00147 | DB00163 | DB00360 |
| DB00377 | DB00505 | DB00536 | DB00769 | DB00836 | DB01164 |
| DB01294 | DB01345 | DB01370 | DB01373 | DB01378 | DB01593 |
| DB02329 | DB02659 | DB02901 | DB04876 | DB08907 |         |

(2) 12 drug samples in class “Blood and blood forming organs”

|         |         |         |         |         |         |
|---------|---------|---------|---------|---------|---------|
| DB00407 | DB00682 | DB00775 | DB01088 | DB01109 | DB01164 |
| DB01225 | DB01345 | DB01373 | DB01378 | DB01592 | DB01593 |

(3) 21 drug samples in class “Cardiovascular system”

|         |         |         |         |         |         |
|---------|---------|---------|---------|---------|---------|
| DB00147 | DB00148 | DB00159 | DB00325 | DB00373 | DB00375 |
| DB00464 | DB00509 | DB00542 | DB00686 | DB00769 | DB01109 |
| DB01116 | DB01345 | DB01370 | DB01373 | DB01378 | DB01412 |
| DB01592 | DB01593 | DB04840 |         |         |         |

(4) 15 drug samples in class “Dermatologicals”

|         |         |         |         |         |         |
|---------|---------|---------|---------|---------|---------|
| DB00129 | DB00337 | DB00596 | DB00626 | DB00764 | DB00769 |
| DB00856 | DB00971 | DB01123 | DB01130 | DB01345 | DB01370 |
| DB01373 | DB01378 | DB01593 |         |         |         |

(5) 9 drug samples in class “Genito urinary system and sex hormones”

|         |         |         |         |         |         |
|---------|---------|---------|---------|---------|---------|
| DB00957 | DB01152 | DB01164 | DB01373 | DB01378 | DB02901 |
| DB04938 | DB06713 | DB06730 |         |         |         |

(6) 5 drug samples in class “Systemic hormonal preparations, excluding sex hormones and insulins”

|         |         |         |         |         |  |
|---------|---------|---------|---------|---------|--|
| DB00509 | DB01345 | DB02638 | DB04630 | DB08869 |  |
|---------|---------|---------|---------|---------|--|

(7) 10 drug samples in class “Antiinfectives for systemic use”

|         |         |         |         |         |         |
|---------|---------|---------|---------|---------|---------|
| DB00260 | DB00369 | DB00626 | DB00955 | DB01373 | DB01601 |
| DB01604 | DB03615 | DB04835 | DB08795 |         |         |

(8) 10 drug samples in class “Antineoplastic and immunomodulating agents”

|         |         |         |         |         |         |
|---------|---------|---------|---------|---------|---------|
| DB00290 | DB00539 | DB00570 | DB00642 | DB00707 | DB04106 |
| DB05109 | DB08881 | DB08889 | DB08910 |         |         |

(9) 7 drug samples in class “Musculo-skeletal system”

|         |         |         |         |         |         |
|---------|---------|---------|---------|---------|---------|
| DB00141 | DB00416 | DB00732 | DB00825 | DB01337 | DB01339 |
| DB01370 |         |         |         |         |         |

(10) 13 drug samples in class "Nervous system"

|         |         |         |         |         |         |
|---------|---------|---------|---------|---------|---------|
| DB00122 | DB00176 | DB00234 | DB00647 | DB00837 | DB01063 |
| DB01273 | DB01345 | DB01354 | DB01373 | DB01440 | DB01592 |
| DB04948 |         |         |         |         |         |

(11) 7 drug samples in class "Antiparasitic products, insecticides and repellents"

|         |         |         |         |         |         |
|---------|---------|---------|---------|---------|---------|
| DB00129 | DB00738 | DB01131 | DB01345 | DB02640 | DB04786 |
| DB06708 |         |         |         |         |         |

(12) 16 drug samples in class "Respiratory system"

|         |         |         |         |         |         |
|---------|---------|---------|---------|---------|---------|
| DB00122 | DB00151 | DB00332 | DB00397 | DB00626 | DB00764 |
| DB00768 | DB00825 | DB00985 | DB01274 | DB01345 | DB01373 |
| DB01409 | DB01411 | DB01412 | DB04819 |         |         |

(13) 9 drug samples in class "Sensory organs"

|         |         |         |         |         |         |
|---------|---------|---------|---------|---------|---------|
| DB00122 | DB00151 | DB00373 | DB00768 | DB00955 | DB01109 |
| DB01345 | DB01370 | DB01593 |         |         |         |

(14) 11 drug samples in class "Various"

|         |         |         |         |         |         |
|---------|---------|---------|---------|---------|---------|
| DB00122 | DB00151 | DB00638 | DB00733 | DB00743 | DB01130 |
| DB01345 | DB01373 | DB01378 | DB01592 | DB04173 |         |
